# Supplementary material for: Serological Analysis of IgG and IgM Antibodies against Anaplasma spp. in Various Animal Species of the Qinghai-Tibetan Plateau
Source: MDPI journal article supplement (doi:10.3390/ani12192723), 2022-10-10
Supplement: s1 [file s1]

Table S1. Sampling sites in the study

| Prefectures | Sampling Sites      | Latitude and longitude (N', E') | No. of Serum Samples * |     |        |               |     |         |       |        |           |           | Total |
|-------------|---------------------|---------------------------------|------------------------|-----|--------|---------------|-----|---------|-------|--------|-----------|-----------|-------|
|             |                     |                                 | Yak                    | Cow | Cattle | Tibetan Sheep | Pig | Chicken | Horse | Donkey | Stray Dog | Stray Cat |       |
| Haibei      | Menyuan (2866 m)    | 37.38, 101.61                   | 20                     | 0   | 11     | 36            | 0   | 0       | 0     | 0      | 0         | 0         | 67    |
|             | Gangcha (3827 m)    | 37.32, 100.14                   | 0                      | 0   | 0      | 404           | 0   | 0       | 14    | 0      | 0         | 0         | 418   |
|             | Haiyan (3000 m)     | 36.89, 100.99                   | 104                    | 0   | 0      | 45            | 0   | 0       | 10    | 0      | 0         | 0         | 159   |
|             | Total               |                                 | 124                    | 0   | 11     | 485           | 0   | 0       | 24    | 0      | 0         | 0         | 644   |
| Hainan      | Gonghe (3200 m)     | 36.28, 100.62                   | 20                     | 0   | 0      | 190           | 0   | 0       | 265   | 0      | 0         | 0         | 475   |
|             | Guide (2200 m)      | 36.04, 101.43                   | 0                      | 0   | 0      | 0             | 30  | 0       | 0     | 0      | 0         | 0         | 30    |
|             | Total               |                                 | 20                     | 0   | 0      | 190           | 30  | 0       | 265   | 0      | 0         | 0         | 505   |
| Haixi       | Delingha (2980 m)   | 37.36, 97.36                    | 0                      | 0   | 45     | 0             | 30  | 0       | 0     | 0      | 0         | 0         | 75    |
|             | Golmud (2780 m)     | 36.40, 94.90                    | 20                     | 0   | 0      | 0             | 20  | 0       | 0     | 0      | 0         | 0         | 40    |
|             | Tianjun (3993 m)    | 37.30, 99.02                    | 0                      | 0   | 0      | 8             | 0   | 0       | 0     | 0      | 0         | 0         | 8     |
|             | Total               |                                 | 20                     | 0   | 45     | 8             | 50  | 0       | 0     | 0      | 0         | 0         | 123   |
| Yushu       | Zhiduo (4897 m)     | 33.84, 95.61                    | 20                     | 0   | 0      | 0             | 0   | 0       | 0     | 0      | 0         | 0         | 20    |
|             | Total               |                                 | 20                     | 0   | 0      | 0             | 0   | 0       | 0     | 0      | 0         | 0         | 20    |
| Guoluo      | Maqin (4100 m)      | 34.47, 100.23                   | 110                    | 0   | 50     | 0             | 0   | 0       | 0     | 0      | 0         | 0         | 160   |
|             | Darlag (4271 m)     | 33.74, 99.65                    | 86                     | 0   | 0      | 0             | 0   | 0       | 0     | 0      | 0         | 0         | 86    |
|             | Banma (3970 m)      | 32.93, 100.73                   | 133                    | 0   | 0      | 0             | 0   | 0       | 0     | 0      | 0         | 0         | 133   |
|             | Total               |                                 | 329                    | 0   | 50     | 0             | 0   | 0       | 0     | 0      | 0         | 0         | 379   |
| Huangnan    | Jianzha (2063 m)    | 35.93, 102.03                   | 0                      | 0   | 45     | 45            | 0   | 0       | 0     | 0      | 0         | 0         | 90    |
|             | Henan (4000 m)      | 34.73, 101.61                   | 0                      | 0   | 0      | 0             | 0   | 0       | 60    | 0      | 0         | 0         | 60    |
|             | Total               |                                 | 0                      | 0   | 45     | 45            | 0   | 0       | 60    | 0      | 0         | 0         | 150   |
| Haidong     | Huzhu (2535 m)      | 36.84, 101.95                   | 40                     | 0   | 0      | 21            | 48  | 30      | 0     | 40     | 0         | 0         | 179   |
|             | Ledu (2000 m)       | 36.48, 102.40                   | 20                     | 282 | 100    | 0             | 67  | 0       | 0     | 0      | 0         | 0         | 469   |
|             | Minhe (2174 m)      | 36.32, 102.83                   | 0                      | 207 | 0      | 0             | 0   | 30      | 0     | 0      | 0         | 0         | 237   |
|             | Pingan (2183 m)     | 36.50, 102.10                   | 0                      | 0   | 0      | 45            | 77  | 0       | 0     | 0      | 0         | 0         | 122   |
|             | Total               |                                 | 60                     | 489 | 100    | 66            | 192 | 60      | 0     | 40     | 0         | 0         | 1007  |
| Xining      | Datong (2756 m)     | 36.92, 101.68                   | 219                    | 0   | 200    | 0             | 30  | 80      | 30    | 0      | 0         | 0         | 559   |
|             | Huangzhong (2645 m) | 36.50, 101.57                   | 0                      | 0   | 0      | 0             | 30  | 50      | 10    | 0      | 0         | 0         | 90    |
|             | Huangyuan (2660 m)  | 36.68, 101.25                   | 0                      | 0   | 0      | 0             | 48  | 30      | 0     | 0      | 0         | 0         | 78    |
|             | Xining (2261 m)     | 36.65, 101.76                   | 0                      | 0   | 0      | 0             | 44  | 0       | 0     | 0      | 226       | 127       | 397   |
|             | Total               |                                 | 219                    | 0   | 200    | 0             | 152 | 160     | 40    | 0      | 226       | 127       | 1124  |
| Total       |                     |                                 | 792                    | 489 | 451    | 794           | 424 | 220     | 389   | 40     | 226       | 127       | 3952  |
