# Supplementary figures and images for: Serological Analysis of IgG and IgM Antibodies against Anaplasma spp. in Various Animal Species of the Qinghai-Tibetan Plateau
Source: MDPI journal article supplement (doi:10.3390/ani12192723), 2022-10-10

Figure S1

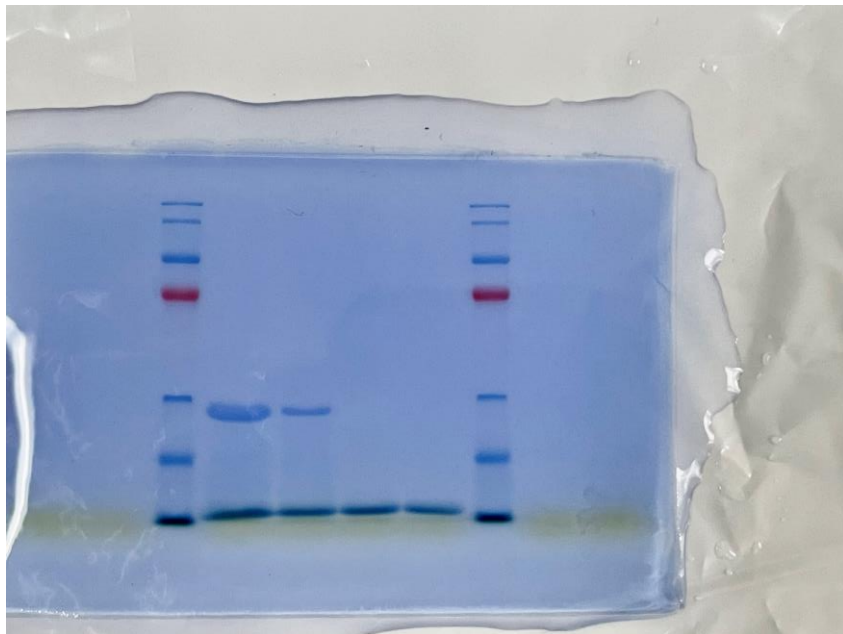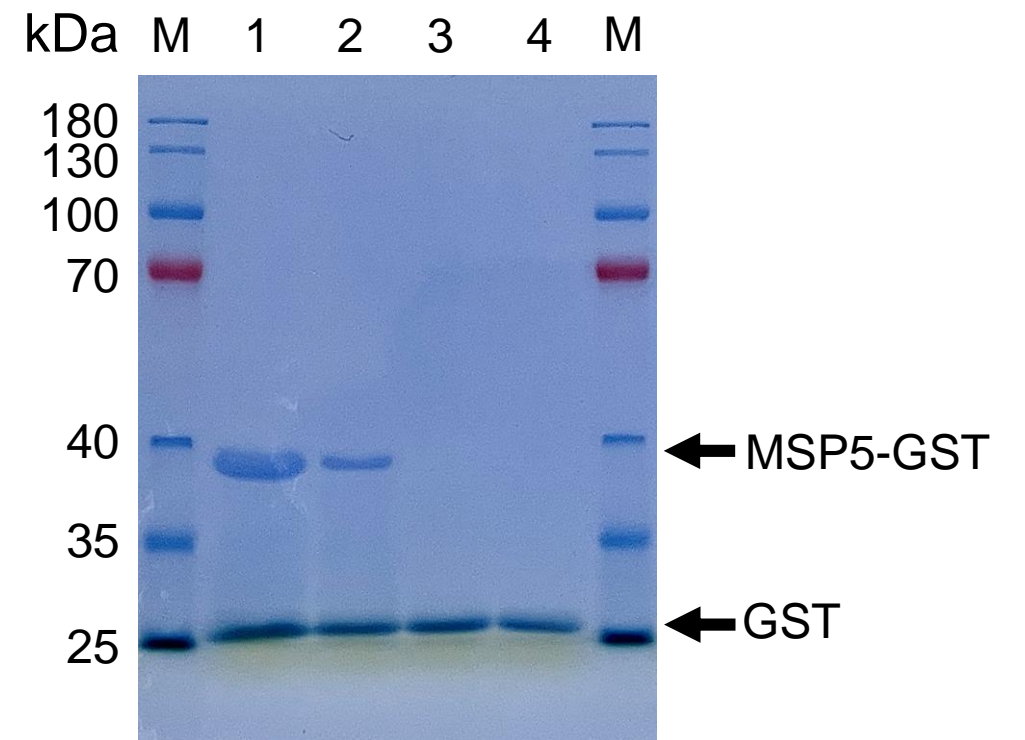

Supplement: s1 [file s1]
